# Supplementary figures and images for: Effects of melt aging and off-stoichiometric melts on CsSrI3:Eu2+ single crystal scintillators
Source: Royal Society of Chemistry journal article supplement (doi:10.1039/c6cp00271d), 2016-01-01

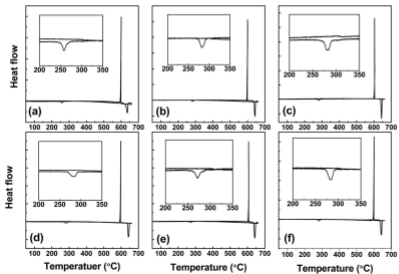

Supplement: c6cp00271d1.pdf [file c6cp00271d1.pdf]
